# Supplementary material for: Phase I Clinical Trial to Determine the Feasibility and Maximum Tolerated Dose of Panitumumab to Standard Gemcitabine-Based Chemoradiation in Locally Advanced Pancreatic Cancer
Source: Oxford University Press journal article supplement (doi:10.1158/1078-0432.ccr-14-3364), 2015-06-08
Supplement: 10780432ccr143364-sup-143063_2_data_0_npdhwr.docx [file 10780432ccr143364-sup-143063_2_data_0_npdhwr.docx]

**Supplementary Table 1**

**Supplementary Table 2**

| Cohort | Mean (median) tumor size (mm)* | Standard error of mean (mm) |
| --- | --- | --- |
| 1 mg/kg | 37 (33) | 11 |
| 1,5 mg/kg | 43 (38) | 8 |
| 2 mg/kg | 43 (36) | 16 |

*Longest diameter of measurable primary tumor
